# Supplementary material for: One-dimensional hierarchical structured MoS2with an ordered stacking of nanosheets: a facile template-free hydrothermal synthesis strategy and application as an efficient hydrogen evolution electrocatalyst
Source: Royal Society of Chemistry journal article supplement (doi:10.1039/c6ce02108e), 2016-11-22
Supplement: c6ce02108e1.pdf [file c6ce02108e1.pdf]

**Electronic Supplementary Information (ESI)**

**One-dimensional hierarchical structured MoS<sub>2</sub> with nanosheets ordered stacking:  
a facile template-free hydrothermal synthesis strategy and application as an  
efficient hydrogen evolution electrocatalyst**

Weizhi Wang,<sup>\*a</sup> Yafei Xu,<sup>a</sup> Qian Liu,<sup>a</sup> Xinxing Wang,<sup>a</sup> Changchun Ji,<sup>a</sup> Konglin Wu,<sup>a</sup>  
Nan Yu,<sup>a</sup> Jiarui Huang<sup>a</sup> and Si Ok Ryu<sup>\*b</sup>

*<sup>a</sup>The Key Laboratory of Functional Molecular Solids, Ministry of Education, Anhui  
Laboratory of Molecular-Based Materials, College of Chemistry and Materials  
Science, Anhui Normal University, Wuhu 241000, P.R. China.*

E-mail: wangwz@mail.ahnu.edu.cn

*<sup>b</sup>School of Chemical Engineering, Yeungnam University, Gyeongsan, Gyeoungbuk  
712749, R. Korea.*

E-mail: soryu@ynu.ac.kr

## **Experimental section**

### **Reagents and materials**

Sodium molybdate ( $\text{Na}_2\text{MoO}_4 \cdot 2\text{H}_2\text{O}$ ), thioglycolic acid (TGA) and molybdenum trioxide ( $\text{MoO}_3$ ) were obtained from Shanghai Aladdin Reagents Co. Ammonia water ( $\text{NH}_3 \cdot \text{H}_2\text{O}$ , 25–28% w/w), thiacetamide, thiourea, urea, and ethanol were purchased from Shanghai Chemical Reagents Co. All reagents used in this work were analytical reagents (A. R.) without any further purification.

### **Synthesis of nanosheets ordered stacking one-dimensional hierarchical $\text{MoS}_2$**

A typical procedure was as follows: 0.1 mmol of  $\text{Na}_2\text{MoO}_4 \cdot 2\text{H}_2\text{O}$  was dissolved in 30 mL of distilled water. Subsequently, 200  $\mu\text{L}$  of TGA and 0.5 mL of  $\text{NH}_3 \cdot \text{H}_2\text{O}$  were added slowly to the solution with stirring until a clear mixture was formed. The above mixture was transferred to a Teflon-lined autoclave (50 mL capacity), which was sealed and heated in an oven at 220 °C for 12 h, then allowed to cool naturally to room temperature. The products were subsequently isolated by centrifugation and cleaned by several cycles of centrifugation/washing/redispersion in distilled water and in ethanol. Finally, the products were dried in a vacuum at 60 °C for 6 h.

### **Synthesis of flower-like $\text{MoS}_2$ with nanosheets unordered stacking**

Flower-like  $\text{MoS}_2$  with nanosheets unordered stacking was prepared by a modified hydrothermal method reported in the literature.<sup>1, 2</sup> Typically, 30 mg of  $\text{MoO}_3$ , 35 mg of thiacetamide and 0.3 g of urea were added to the mixture of 15 mL of distilled water and 25 mL of absolute ethanol under vigorous stirring. After stirring for 1 h, the mixture was then transferred into a Teflon-lined autoclave (50 mL capacity), which was sealed and heated in an oven at 200 °C for 24 h. The autoclave was cooled to room temperature naturally, and then the precipitates were separated by centrifugation, washed with distilled water and absolute ethanol, and dried in a vacuum oven at 60 °C for 6 h.

### **Characterization**

X-ray powder diffraction (XRD) pattern of the products were recorded using a Bruker D8 ADVANCE X-ray diffractometer with graphite monochromatized  $\text{Cu}_{K\alpha}$

radiation ( $\lambda = 1.5418 \text{ \AA}$ ). Field emission scanning electron microscopy (FESEM) was performed on a Hitachi S-4800 scanning electron microscope. Transmission electron microscopy (TEM) images were obtained using a HITACHI HT-7700 transmission electron microscope at an accelerating voltage of 120 kV. High-resolution transmission electron microscopy (HRTEM) images were obtained using a FEI Tecnai G20 transmission electron microscope at an accelerating voltage of 200 kV. The energy dispersive X-ray (EDX) spectrum was recorded with a Hitachi S-4800 scanning electron microscope equipped with an INCAx-Sight OXFORD energy-dispersion X-ray fluorescence analyzer. Raman spectrum was recorded using a Renishaw inVia confocal Raman microscope spectrometer equipped with a 532 nm laser as the exciting radiation. X-ray photoelectron spectroscopy (XPS) was recorded on a UIVAC-PHI PHI 5000 VersaProbe X-ray photoelectron spectrometer equipped with a nonmonochromatic  $\text{Al}_{K\alpha}$  excitation source ( $h\nu = 1486.6 \text{ eV}$ ). Fourier transform infrared (FTIR) spectrum was recorded on a Shimadzu IR Prestige21 FTIR spectrometer in the wave numbers of  $500\text{-}4000 \text{ cm}^{-1}$  at room temperature, with the sample in a KBr disk.

### **Electrochemical measurements**

All electrochemical measurements were performed with a CHI 660E electrochemical analyzer (Chenhua Instruments, Inc., Shanghai) in a standard three-electrode system at room temperature. A Pt foil and a saturated calomel electrode (SCE) were used as the counter and the reference electrodes, respectively. The working electrode was prepared as follows. 4mg of the products and 40  $\mu\text{l}$  of Nafion solution (5wt%, Sigma-Aldrich) were dispersed in 1 ml of 3:1 v/v water/ethanol mixture by about 30 min of ultrasonication to generate a homogeneous ink. Next, 10  $\mu\text{l}$  of the ink was loaded onto a glassy carbon electrode (GCE) of 3 mm in diameter. Linear sweep voltammetry (LSV) at a scan rate of 5 mV/s was subsequently conducted in an electrolyte solution of 0.5 M  $\text{H}_2\text{SO}_4$ . All potentials reported in our manuscript were referenced to reversible hydrogen electrode (RHE). In 0.5 M  $\text{H}_2\text{SO}_4$ ,  $E(\text{RHE}) = E(\text{SCE}) + 0.28 \text{ V}$ . AC impedance measurements were performed in the

same configuration at  $\eta = 200$  mv from  $10^5$  to 0.01 Hz with an AC voltage of 5 mV.

## References

1. H. L. Yu, C. L. Zhu, K. Zhang, Y. J. Chen, C. Y. Li, P. Gao, P. P. Yang and Q. Y. Ouyang, *J. Mater. Chem. A*, 2014, **2**, 4551-4557.
2. H. L. Yu, C. Ma, B. H. Ge, Y. J. Chen, Z. Xu, C. L. Zhu, C. Y. Li, Q. Y. Ouyang, P. Gao, J. Q. Li, C. W. Sun, L. H. Qi, Y. M. Wang and F. H. Li, *Chem. -Eur. J.*, 2013, **19**, 5818-5823.

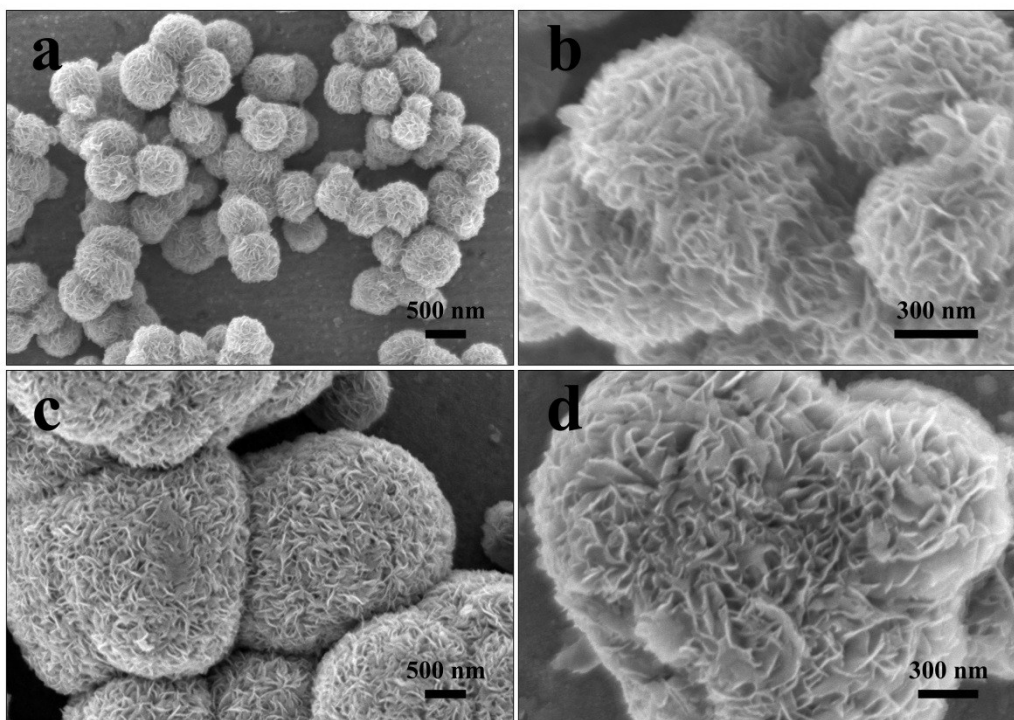

**Fig. S1** FESEM images of the products prepared with (a, b) thiacetamide and (c, d) thiourea as sulfur source

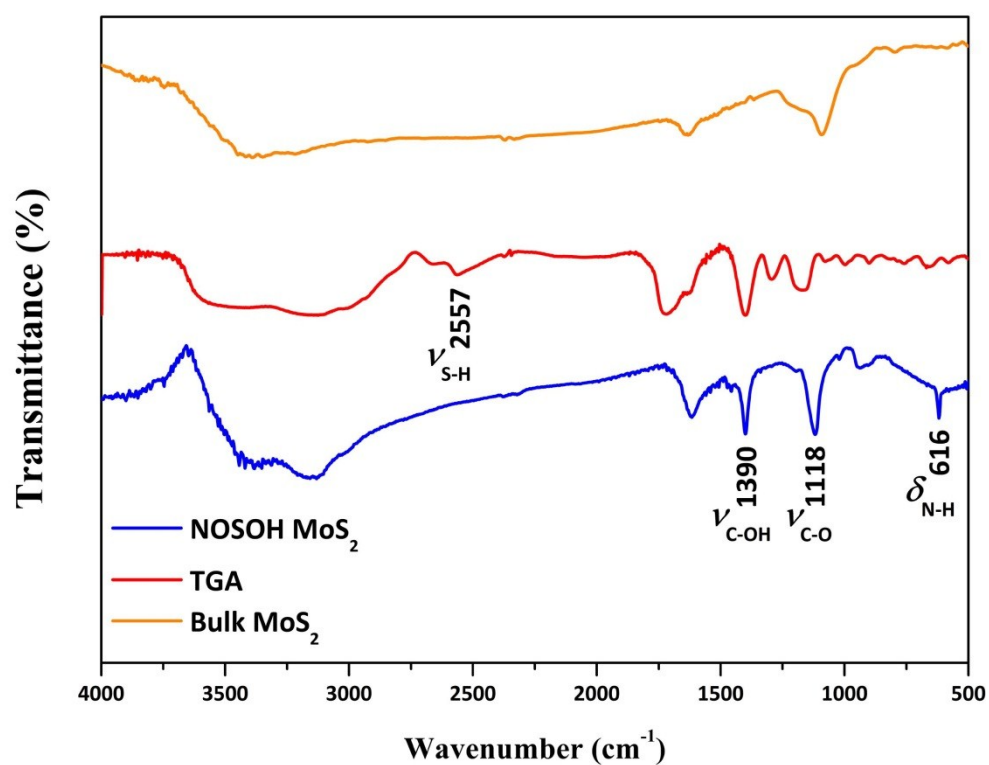

**Fig. S2** FTIR spectra of the NOSOH  $\text{MoS}_2$ , TGA and bulk  $\text{MoS}_2$

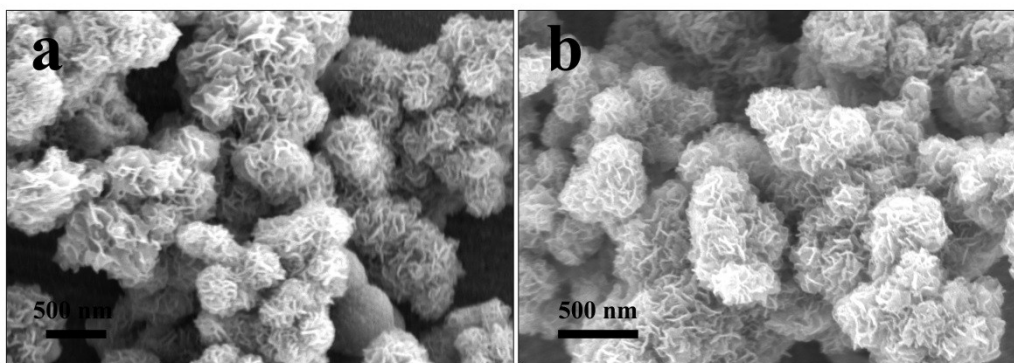

**Fig. S3** FESEM images of the flower-like MoS<sub>2</sub> with nanosheets unordered stacking

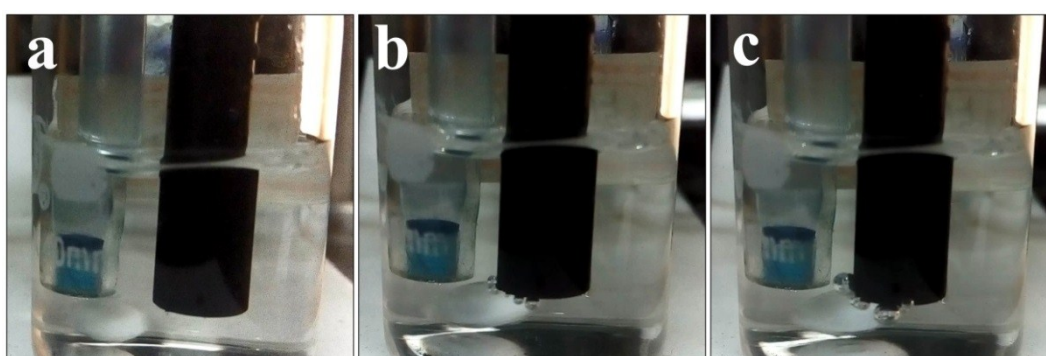

**Fig. S4** Optical photograph showing the gradual generation of hydrogen bubbles on the NOSOH MoS<sub>2</sub> catalysts modified GCE: (a) 0, (b) 30 and (c) 60 s.
